# Supplementary material
Source: Springer Nature journal article supplement (https://www.springermedizin.de/resource/supplementary/12889_2012_4142_MOESM3_ESM.pdf/9491742)
Supplement: MOESM3 [file 9491742]

Figure 1. Estimation of total opioid users compared to opioid users entering drug treatment

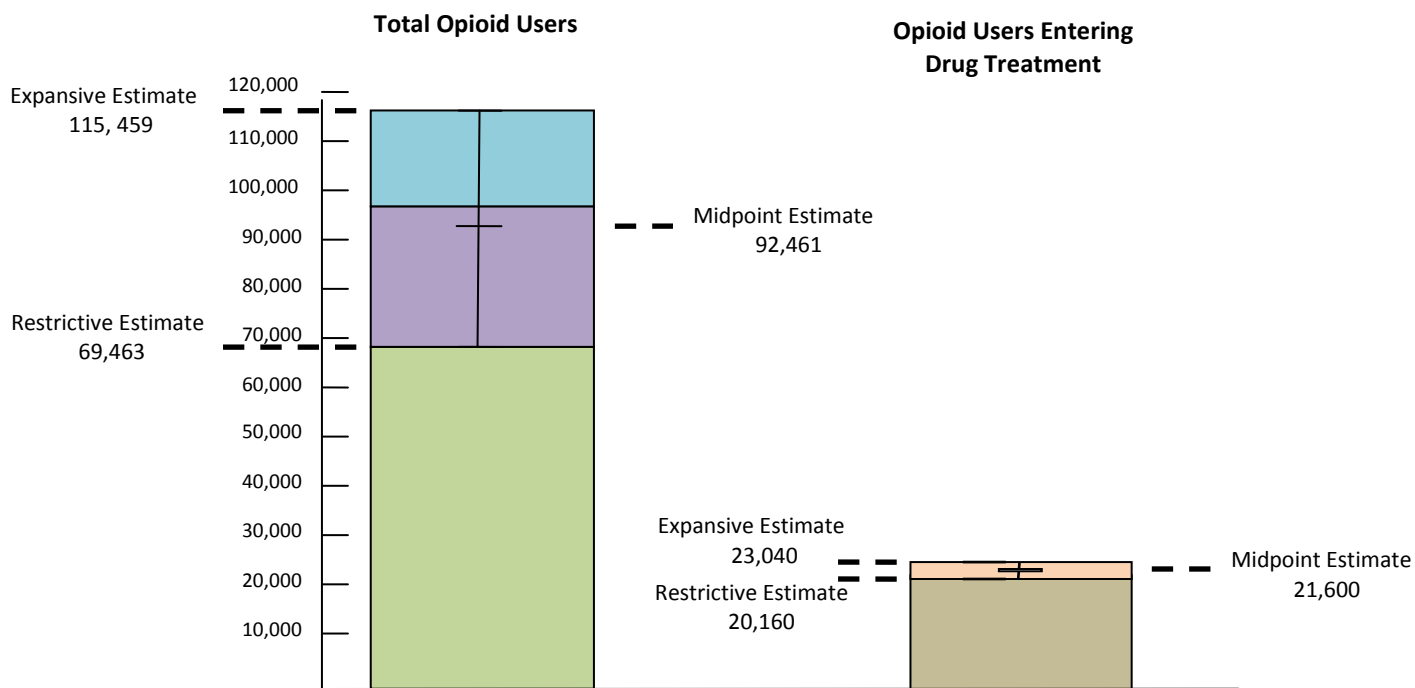

Opioid user subpopulations: midpoint estimates

|                                 |                                         |
|---------------------------------|-----------------------------------------|
| Medical Services (M) = 17,618   | Buprenorphine Prescriptions (B) = 2,880 |
| Drug Services (D) = 28,378      | Drug Treatment Programs (P) = 20,160    |
| General Population (G) = 69,463 |                                         |
